# Supplementary material for: Genomic Patterns of Iberian Wild Bees Reveal Levels of Diversity, Differentiation and Population Structure, Supporting the “Refugia within Refugia” Hypothesis
Source: MDPI journal article supplement (doi:10.3390/d15060746), 2023-06-06
Supplement: s1 [file s1]

## Title

Genomic patterns of Iberian wild bees reveal levels of diversity, differentiation and population structure supporting the "refugia within refugia" hypothesis.

## Authors

Paulo de Sousa<sup>1</sup> & André Henriques<sup>1</sup>, Sara E. Silva<sup>1</sup>, Luísa G. Carvalheiro<sup>1,2</sup>, Guy Smagghe<sup>3</sup>, Denis Michez<sup>4</sup>, Thomas J. Wood<sup>4</sup>, Octávio S. Paulo<sup>1\*</sup>.

## Affiliation and corresponding author

\*octavio.paulo@fc.ul.pt

1- cE3c - Center for Ecology, Evolution and Environmental Changes & CHANGE - Global Change and Sustainability Institute, Departamento de Biologia Animal, Faculdade de Ciências, Universidade de Lisboa, 1749-016 Lisboa, Portugal

2 - Department of Ecology, Universidade Federal de Goiás, Goiânia, Brazil

3 - Laboratory of Agrozoology, Department of Plants and Crops, Faculty of Bioscience Engineering, Ghent University, Ghent, Belgium

4 - Laboratory of Zoology, Research Institute of Biosciences, University of Mons, Place du Parc 20, 7000 Mons, Belgium,

## Supplementary Material

## Supplementary information

### Tables

Table S1: Information of sampled bees. Specimens that have a longer ID were samples not used in the analysis and for that reason their field code was not changed.

| Sample ID            | Species            | Sampling Site code | Sampling Site name | Latitude   | Longitude  |
|----------------------|--------------------|--------------------|--------------------|------------|------------|
| Bet_01               | Andrena agilissima | Bet                | Baetic mountains   | 36.9556777 | -2.9593338 |
| Bet_02               | Andrena agilissima | Bet                | Baetic mountains   | 36.9853001 | -3.1198463 |
| Bet_03               | Andrena agilissima | Bet                | Baetic mountains   | 36.9853001 | -3.1198463 |
| Bet_04               | Andrena agilissima | Bet                | Baetic mountains   | 36.9853001 | -3.1198463 |
| Cat_01               | Andrena agilissima | Cat                | Catalonia          | 40.8754721 | 0.5007094  |
| And_Cat_001_Poll128  | Andrena agilissima | Cat                | Catalonia          | 40.8754721 | 0.5007094  |
| Fzz_01               | Andrena agilissima | Fzz                | Ferreira do Zêzere | 39.6350900 | -8.2916300 |
| Gal_01               | Andrena agilissima | Gal                | Galicia            | 42.4680732 | -7.2613812 |
| Gal_02               | Andrena agilissima | Gal                | Galicia            | 42.4680732 | -7.2573163 |
| Gal_03               | Andrena agilissima | Gal                | Galicia            | 42.4680732 | -7.2613812 |
| Gal_04               | Andrena agilissima | Gal                | Galicia            | 42.4747255 | -7.2782602 |
| And_Gua_001_Poll_121 | Andrena agilissima | Gua                | Guadalajara        | 40.7815084 | -3.2310376 |
| Jac_01               | Andrena agilissima | Jac                | Jaca               | 42.5653434 | -0.5154760 |
| Jac_02               | Andrena agilissima | Jac                | Jaca               | 42.5653434 | -0.5154760 |

|                      |                    |     |                        |            |            |
|----------------------|--------------------|-----|------------------------|------------|------------|
| And_Jac_045_Poll_130 | Andrena agilissima | Jac | Jaca                   | 42.5653434 | -0.5154760 |
| And_TurA_016_Poll71  | Andrena agilissima | Tur | Turcufal               | 39.046187  | -9.271455  |
| And_01               | Andrena flavipes   | And | Andalucia              | 37.4890027 | -3.6120980 |
| And_02               | Andrena flavipes   | And | Andalucia              | 37.4890027 | -3.6120980 |
| And_03               | Andrena flavipes   | And | Andalucia              | 37.4890027 | -3.6120980 |
| And_04               | Andrena flavipes   | And | Andalucia              | 37.4890027 | -3.6120980 |
| And_05               | Andrena flavipes   | And | Andalucia              | 37.4890027 | -3.6120980 |
| And_06               | Andrena flavipes   | And | Andalucia              | 37.4890027 | -3.6120980 |
| Bej_01               | Andrena flavipes   | Bej | Bejar                  | 40.3727018 | -5.8220921 |
| Bej_02               | Andrena flavipes   | Bej | Bejar                  | 40.3727018 | -5.8220921 |
| Bej_03               | Andrena flavipes   | Bej | Bejar                  | 40.3727018 | -5.8220921 |
| Bej_04               | Andrena flavipes   | Bej | Bejar                  | 40.3727018 | -5.8220921 |
| Bet_01               | Andrena flavipes   | Bet | Baetic mountains       | 36.9853001 | -3.1198463 |
| Bet_02               | Andrena flavipes   | Bet | Baetic mountains       | 36.9853001 | -3.1198463 |
| Bet_03               | Andrena flavipes   | Bet | Baetic mountains       | 36.9853001 | -3.1198463 |
| And_Bet_015_Poll123  | Andrena flavipes   | Bet | Baetic mountains       | 36.9853001 | -3.1198463 |
| Cat_01               | Andrena flavipes   | Cat | Catalonia              | 40.8632260 | 0.3866056  |
| Cat_02               | Andrena flavipes   | Cat | Catalonia              | 40.8632260 | 0.3866056  |
| Cat_03               | Andrena flavipes   | Cat | Catalonia              | 40.8632260 | 0.3866056  |
| Cat_04               | Andrena flavipes   | Cat | Catalonia              | 40.8632260 | 0.3866056  |
| Clm_01               | Andrena flavipes   | Clm | Castilla-La Mancha     | 39.0334127 | -1.9019997 |
| Clm_02               | Andrena flavipes   | Clm | Castilla-La Mancha     | 39.0334127 | -1.9019997 |
| Clm_03               | Andrena flavipes   | Clm | Castilla-La Mancha     | 39.0334127 | -1.9019997 |
| Clm_04               | Andrena flavipes   | Clm | Castilla-La Mancha     | 39.0334127 | -1.9019997 |
| Fvf_01               | Andrena flavipes   | Fvf | Foros de Vale Figueira | 38.7184430 | -8.3245650 |
| Fvf_02               | Andrena flavipes   | Fvf | Foros de Vale Figueira | 38.7184430 | -8.3245650 |
| Fvf_03               | Andrena flavipes   | Fvf | Foros de Vale Figueira | 38.7184430 | -8.3245650 |
| AND_FVFN_009_poll015 | Andrena flavipes   | Fvf | Foros de Vale Figueira | 38.7184430 | -8.3245650 |
| Gal_01               | Andrena flavipes   | Gal | Galicia                | 42.4747255 | -7.2782602 |
| Gal_02               | Andrena flavipes   | Gal | Galicia                | 42.4747255 | -7.2782602 |
| Gal_03               | Andrena flavipes   | Gal | Galicia                | 42.4628360 | -7.2573163 |
| Gal_04               | Andrena flavipes   | Gal | Galicia                | 42.4628360 | -7.2573163 |
| Jac_01               | Andrena flavipes   | Jac | Jaca                   | 42.5653434 | -0.5154760 |
| Jac_02               | Andrena flavipes   | Jac | Jaca                   | 42.5653434 | -0.5154760 |
| Jac_03               | Andrena flavipes   | Jac | Jaca                   | 42.5653434 | -0.5154760 |
| Jac_04               | Andrena flavipes   | Jac | Jaca                   | 42.5653434 | -0.5154760 |
| Mal_01               | Andrena flavipes   | Mal | Malcata mountain       | 40.3043900 | -6.9626670 |
| Mal_02               | Andrena flavipes   | Mal | Malcata mountain       | 40.3043900 | -6.9626670 |
| Mal_03               | Andrena flavipes   | Mal | Malcata mountain       | 40.3043900 | -6.9626670 |
| Mal_04               | Andrena flavipes   | Mal | Malcata mountain       | 40.3043900 | -6.9626670 |
| Mal_05               | Andrena flavipes   | Mal | Malcata mountain       | 40.3043900 | -6.9626670 |
| Mal_06               | Andrena flavipes   | Mal | Malcata mountain       | 40.3043900 | -6.9626670 |
| Mgr_01               | Andrena flavipes   | Mgr | Marinha Grande         | 39.8628610 | -8.9329570 |
| Mgr_02               | Andrena flavipes   | Mgr | Marinha Grande         | 39.8584490 | -8.8355940 |
| Mgr_03               | Andrena flavipes   | Mgr | Marinha Grande         | 39.8584490 | -8.8355940 |
| Mgr_04               | Andrena flavipes   | Mgr | Marinha Grande         | 39.8582690 | -8.8840710 |
| Ode_01               | Andrena flavipes   | Ode | Odeceixe               | 37.8163900 | -8.6834380 |
| Ode_02               | Andrena flavipes   | Ode | Odeceixe               | 37.8163900 | -8.6834380 |
| Ode_03               | Andrena flavipes   | Ode | Odeceixe               | 37.4237790 | -8.7659270 |

|                      |                            |     |                               |            |            |
|----------------------|----------------------------|-----|-------------------------------|------------|------------|
| Ode_04               | Andrena flavipes           | Ode | Odeceixe<br>Aire e Candeeiros | 37.6012850 | -8.6945060 |
| Sda_01               | Andrena flavipes           | Sda | mountain                      | 39.4924514 | -8.9299633 |
| Sin_01               | Andrena flavipes           | Sin | Sintra                        | 38.8961060 | -9.4332770 |
| Sin_02               | Andrena flavipes           | Sin | Sintra                        | 38.8910270 | -9.3962270 |
| Sin_03               | Andrena flavipes           | Sin | Sintra                        | 38.8910270 | -9.3962270 |
| Sin_04               | Andrena flavipes           | Sin | Sintra                        | 38.8976390 | -9.4191060 |
| Sma_01               | Andrena flavipes           | Sma | São Mamede<br>mountain        | 39.3751530 | -7.3891110 |
| Sma_02               | Andrena flavipes           | Sma | São Mamede<br>mountain        | 39.3489450 | -7.3493450 |
| Sma_03               | Andrena flavipes           | Sma | São Mamede<br>mountain        | 39.3751530 | -7.3891110 |
| Sma_04               | Andrena flavipes           | Sma | São Mamede<br>mountain        | 39.3751530 | -7.3891110 |
| Sma_05               | Andrena flavipes           | Sma | São Mamede<br>mountain        | 39.3751530 | -7.3891110 |
| Sma_06               | Andrena flavipes           | Sma | São Mamede<br>mountain        | 39.3751530 | -7.3891110 |
| And_01               | Lasioglossum<br>malachurum | And | Andalucia                     | 37.0556040 | -4.5907680 |
| And_02               | Lasioglossum<br>malachurum | And | Andalucia                     | 36.6799310 | -5.7001470 |
| And_03               | Lasioglossum<br>malachurum | And | Andalucia                     | 36.6799310 | -5.7001470 |
| And_04               | Lasioglossum<br>malachurum | And | Andalucia                     | 36.6658950 | -5.6745270 |
| Bet_01               | Lasioglossum<br>malachurum | Bet | Baetic mountains              | 37.3201375 | -3.3356380 |
| Bet_02               | Lasioglossum<br>malachurum | Bet | Baetic mountains              | 37.3201375 | -3.3356380 |
| Bet_03               | Lasioglossum<br>malachurum | Bet | Baetic mountains              | 37.3200153 | -3.3355448 |
| Lgl_Bet_015_Poll40   | Lasioglossum<br>malachurum | Bet | Baetic mountains              | 37.3200153 | -3.3355448 |
| Cat_01               | Lasioglossum<br>malachurum | Cat | Catalonia                     | 40.8632260 | 0.3866056  |
| Cat_02               | Lasioglossum<br>malachurum | Cat | Catalonia                     | 40.8632260 | 0.3866056  |
| Cat_03               | Lasioglossum<br>malachurum | Cat | Catalonia                     | 40.8746670 | 0.3968107  |
| Cat_04               | Lasioglossum<br>malachurum | Cat | Catalonia                     | 40.8632260 | 0.3866056  |
| Clm_01               | Lasioglossum<br>malachurum | Clm | Castilla-La<br>Mancha         | 38.9280097 | -1.7369577 |
| Fvf_01               | Lasioglossum<br>malachurum | Fvf | Foros de Vale<br>Figueira     | 38.7184430 | -8.3245650 |
| Fvf_02               | Lasioglossum<br>malachurum | Fvf | Foros de Vale<br>Figueira     | 38.7184430 | -8.3245650 |
| Fvf_03               | Lasioglossum<br>malachurum | Fvf | Foros de Vale<br>Figueira     | 38.7184430 | -8.3245650 |
| Fvf_04               | Lasioglossum<br>malachurum | Fvf | Foros de Vale<br>Figueira     | 38.7184430 | -8.3245650 |
| Lgl_FvfN_009_poll016 | Lasioglossum<br>malachurum | Fvf | Foros de Vale<br>Figueira     | 38.7108960 | -8.3135350 |
| Lgl_FvfN_012_poll016 | Lasioglossum<br>malachurum | Fvf | Foros de Vale<br>Figueira     | 38.7108960 | -8.3135350 |
| Fzz_01               | Lasioglossum<br>malachurum | Fzz | Ferreira do Zezere            | 39.6894830 | -8.3109010 |
| Fzz_01               | Lasioglossum<br>malachurum | Fzz | Ferreira do Zezere            | 39.6875990 | -8.3143900 |

|                      |                         |     |                            |            |            |
|----------------------|-------------------------|-----|----------------------------|------------|------------|
| Fzz_03               | Lasioglossum malachurum | Fzz | Ferreira do Zezere         | 39.6350900 | -8.2916300 |
| Fzz_04               | Lasioglossum malachurum | Fzz | Ferreira do Zezere         | 39.6875990 | -8.3143900 |
| Gua_01               | Lasioglossum malachurum | Gua | Guadalajara                | 40.7562230 | -3.1701773 |
| Gua_02               | Lasioglossum malachurum | Gua | Guadalajara                | 40.7815084 | -3.2310376 |
| Gua_03               | Lasioglossum malachurum | Gua | Guadalajara                | 40.7562230 | -3.1701773 |
| Gua_04               | Lasioglossum malachurum | Gua | Guadalajara                | 40.7562230 | -3.1701773 |
| Mgr_01               | Lasioglossum malachurum | Mgr | Marinha Grande             | 39.8582690 | -8.8840710 |
| Mgr_02               | Lasioglossum malachurum | Mgr | Marinha Grande             | 39.8582690 | -8.8840710 |
| Mgr_03               | Lasioglossum malachurum | Mgr | Marinha Grande             | 39.8582690 | -8.8840710 |
| Lgl_MgrN_004_Poll097 | Lasioglossum malachurum | Mgr | Marinha Grande             | 39.8633300 | -8.9293000 |
| Lgl_MgrN_004_Poll098 | Lasioglossum malachurum | Mgr | Marinha Grande             | 39.8680390 | -8.9236690 |
| Ode_01               | Lasioglossum malachurum | Ode | Odeceixe                   | 37.4377909 | -8.7987614 |
| Ode_02               | Lasioglossum malachurum | Ode | Odeceixe                   | 37.8163900 | -8.6834380 |
| Ode_03               | Lasioglossum malachurum | Ode | Odeceixe                   | 37.4377909 | -8.7987614 |
| Sda_01               | Lasioglossum malachurum | Sda | Aire e Candeeiros mountain | 39.4924514 | -8.9299633 |
| Sin_01               | Lasioglossum malachurum | Sin | Sintra                     | 38.8956340 | -9.4297740 |
| Sin_02               | Lasioglossum malachurum | Sin | Sintra                     | 38.8016958 | -9.4844644 |
| Sin_03               | Lasioglossum malachurum | Sin | Sintra                     | 38.7972590 | -9.4796230 |
| Lgl_SinN_016_Poll102 | Lasioglossum malachurum | Sin | Sintra                     | 38.7827830 | -9.4702320 |
| Lgl_SinN_002_Poll105 | Lasioglossum malachurum | Sin | Sintra                     | 38.8851760 | -9.3969830 |
| Sma_01               | Lasioglossum malachurum | Sma | São Mamede mountain        | 39.3489450 | -7.3493450 |

Table S2: Distribution of samples across sampling area. For each species the sampling sites, the number of samples per sampling site and the total number of individuals retained after filtering (Total) is given.

| Species                | And | Bej | Bet | Cat | Clm | Fvf | Fzz | Gal | Gua |
|------------------------|-----|-----|-----|-----|-----|-----|-----|-----|-----|
| <i>A. agilisissima</i> | 0   | 0   | 4   | 1   | 0   | 0   | 1   | 4   | 0   |
| <i>A. flavipes</i>     | 6   | 4   | 3   | 4   | 4   | 3   | 0   | 4   | 0   |
| <i>L. malachurum</i>   | 4   | 0   | 3   | 4   | 1   | 4   | 4   | 0   | 4   |

  

| Species                | Jac | Mal | Mgr | Ode | Sda | Sin | Sma | Total |
|------------------------|-----|-----|-----|-----|-----|-----|-----|-------|
| <i>A. agilisissima</i> | 2   | 0   | 0   | 0   | 0   | 0   | 0   | 12    |
| <i>A. flavipes</i>     | 4   | 6   | 4   | 4   | 1   | 4   | 6   | 57    |
| <i>L. malachurum</i>   | 0   | 0   | 3   | 3   | 1   | 3   | 1   | 35    |

Table S3: Filtering SNPs. From left to right for each species: number of single nucleotide polymorphic sites (SNPs) before filtering with *vcftools*; number of SNPs after filtering with *vcftools* with only one random SNP per locus and with all SNPs per locus; number of sampled individuals and number of analyzed individuals.

| Species              | SNPs before filtering | SNPs after filtering     |                    | Sampled Individuals | Analyzed Individuals |
|----------------------|-----------------------|--------------------------|--------------------|---------------------|----------------------|
|                      |                       | One random SNP per locus | All SNPs per locus |                     |                      |
| <i>A. agilissima</i> | 43451                 | 14230                    | 26321              | 16                  | 12                   |
| <i>A. flavipes</i>   | 62620                 | 27822                    | 543914             | 59                  | 57                   |
| <i>L. malachurum</i> | 72772                 | 33810                    | 256976             | 43                  | 35                   |

Table S4: Summary statistics by populations: Number of individuals per population (**Npop**); Observed heterozygosity (**Ho**); Expected heterozygosity (**He**); Inbreeding coefficient (**F<sub>IS</sub>**); and Nucleotide diversity (**π**). For **Ho**, **F<sub>IS</sub>** and **π** it is provided the average value and respective standard deviation.

| Species/Populations  | Npop | Ho             | He     | F <sub>IS</sub> | π              |
|----------------------|------|----------------|--------|-----------------|----------------|
| <i>A. agilissima</i> |      |                |        |                 |                |
| West                 | 5    | 0.2277 ± 0.273 | 0.2819 | 0.165 ± 0.563   | 0.2819 ± 0.22  |
| Ebro                 | 3    | 0.2301 ± 0.299 | 0.2735 | 0.0968 ± 0.593  | 0.2735 ± 0.253 |
| Baetic               | 4    | 0.1736 ± 0.248 | 0.2985 | 0.3767 ± 0.581  | 0.2985 ± 0.229 |
| <i>A. flavipes</i>   |      |                |        |                 |                |
| Iberia               | 53   | 0.0809 ± 0.122 | 0.1027 | 0.2791 ± 0.405  | 0.1027 ± 0.123 |
| Pyrenean             | 4    | 0.0781 ± 0.190 | 0.0847 | 0.0415 ± 0.477  | 0.0847 ± 0.176 |
| <i>L. malachurum</i> |      |                |        |                 |                |
| Ebro                 | 4    | 0.1799 ± 0.239 | 0.1921 | 0.0303 ± 0.417  | 0.1921 ± 0.217 |
| Iberia               | 31   | 0.1813 ± 0.155 | 0.1951 | 0.081 ± 0.279   | 0.1951 ± 0.148 |

Table S5: Global differentiation levels by species: Weir and Cockrham's (1984) **F<sub>ST</sub>**; Hedrick (2005) **G'<sub>ST</sub>**; and **Jost's D** (2008).

| Species              | F <sub>ST</sub> | G' <sub>ST</sub> | Jost's D |
|----------------------|-----------------|------------------|----------|
| <i>A. agilissima</i> | 0.0957          | 0.1973           | 0.0654   |
| <i>A. flavipes</i>   | 0.5611          | 0.4352           | 0.1579   |
| <i>L. malachurum</i> | 0.0663          | 0.0896           | 0.0187   |

Table S6: Pairwise differentiation statistics. Hedrick (2005)  $G'_{ST}$  values below the diagonal and Jost's D (2008) above diagonal.

|                      |        |          |        |
|----------------------|--------|----------|--------|
| <i>A. agilisima</i>  |        |          |        |
|                      | West   | Ebro     | Baetic |
| West                 | -      | 0.0646   | 0.0650 |
| Ebro                 | 0.199  | -        | 0.0668 |
| Baetic               | 0.1933 | 0.1999   | -      |
| <i>A. flavipes</i>   |        |          |        |
|                      | Iberia | Pyrennes |        |
| Iberia               | -      | 0.1579   |        |
| Pyrenean             | 0.6686 | -        |        |
| <i>L. malachurum</i> |        |          |        |
|                      | Ebro   | Iberia   |        |
| Ebro                 | -      | 0.0187   |        |
| Iberia               | 0.0896 | -        |        |

Figures

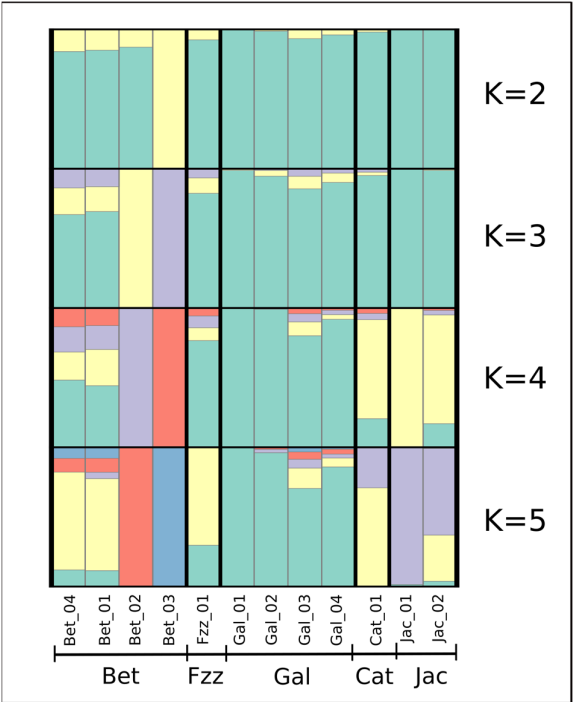

Figure S1: Structure analysis for *Andrena agilissima* using ALStructure for  $k = [2:5]$ .

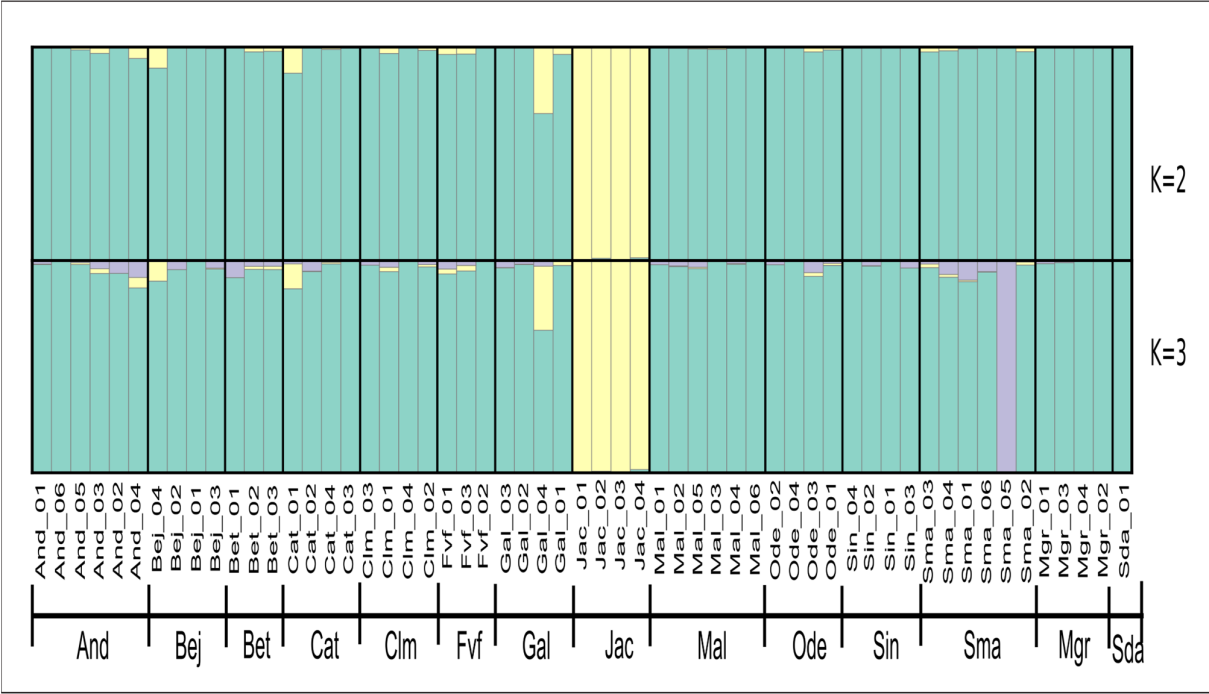

Figure S2: Structure analysis for *Andrena flavipes* using ALStructure for  $k = [2:3]$ .

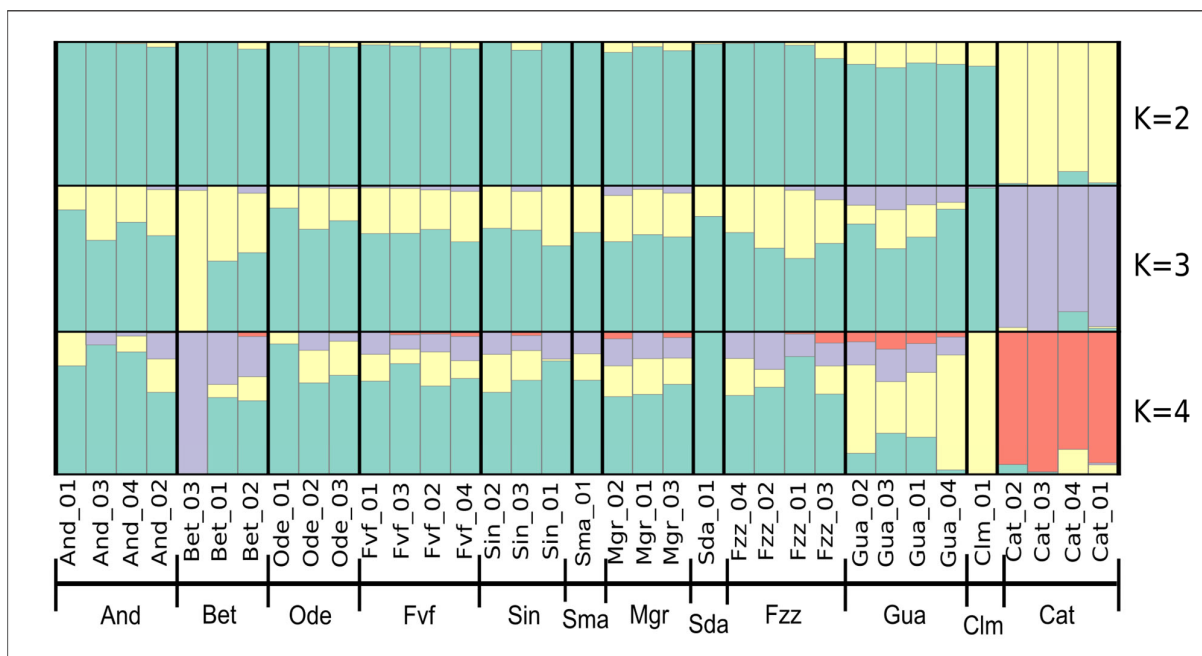

Figure S3: Structure analysis for *Lasioglossum malachurum* using ALStructure for  $k= [2:4]$ .

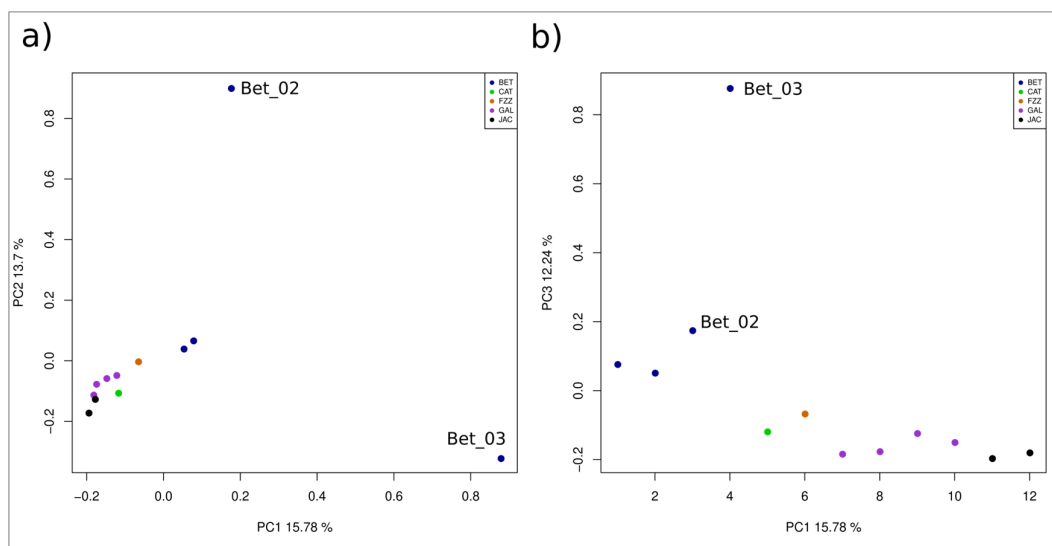

Figure S4: Principal components analysis of *Andrena agilissima*. a) PC1 and PC2 and b) PC1 and PC3.

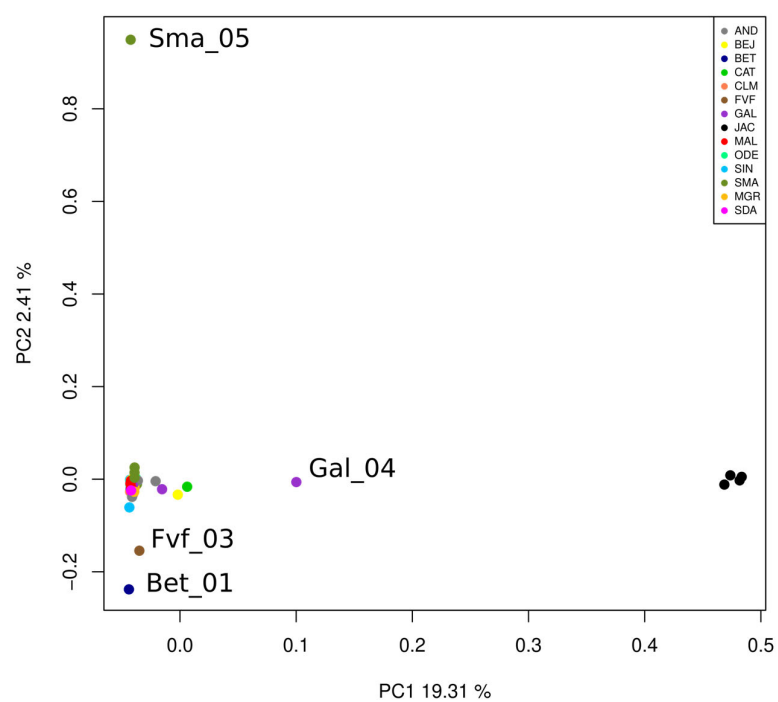

Figure S5: Principal components analysis of *Andrena flavipes*.

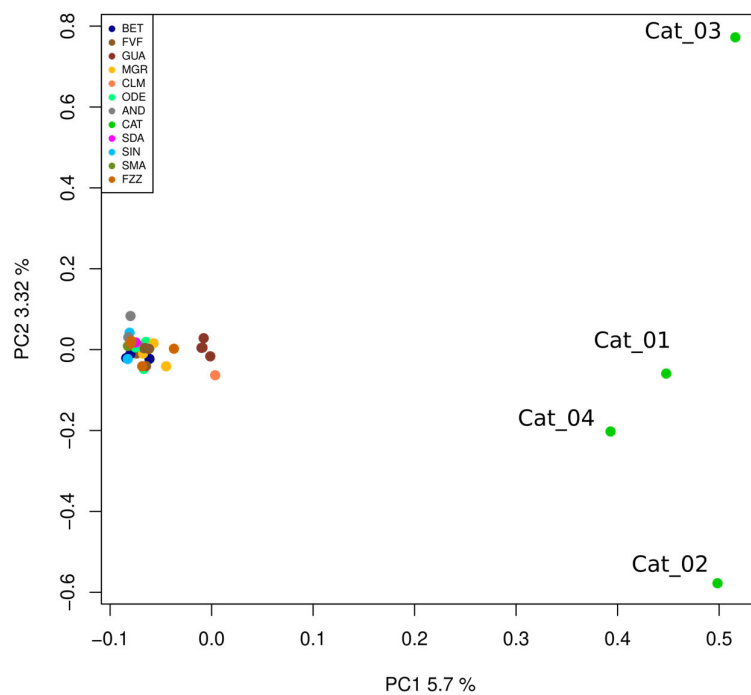

Figure S6: Principal components analysis of *Lasioglossum malachurum*.
